# Supplementary material for: Design and Characterization of Protein E-PilA, a Candidate Fusion Antigen for Nontypeable Haemophilus influenzae Vaccine
Source: PubMed Central journal article supplement (PMC6652776; doi:10.1128/iai.00022-19), 2019-07-23
Supplement: IAI.00022-19-s0001.pdf [file IAI.00022-19-s0001.pdf]

**Supplementary Figure 1.** A. Annotated HCD MS/MS spectrum of the PE peptide containing the disulfide bond between Cys81 and Cys130. The precursor m/z value is 1200.34597 and mass accuracy with the annotated peptide is 0.5 ppm. B. Annotated EThcD MS/MS spectrum of the PilA peptide containing the disulfide bond between Cys23 and Cys33. The precursor m/z value is 701.63846 and mass accuracy with the annotated peptide is 0.1 ppm. C. Annotated HCD MS/MS spectrum of the PilA peptide containing the disulfide bond between Cys92 and Cys105. The precursor m/z value is 1175.7976 and mass accuracy with the annotated peptide is 1.6 ppm.

A

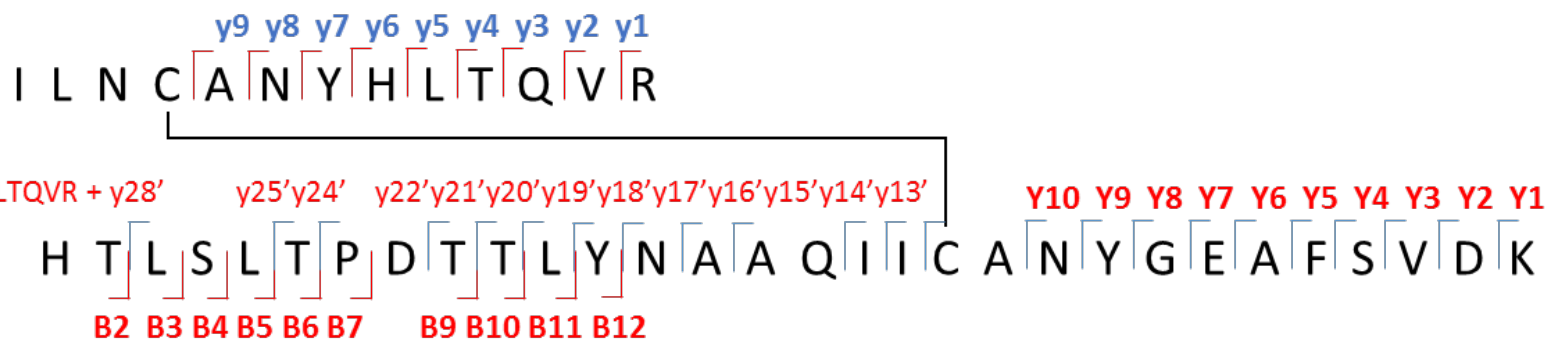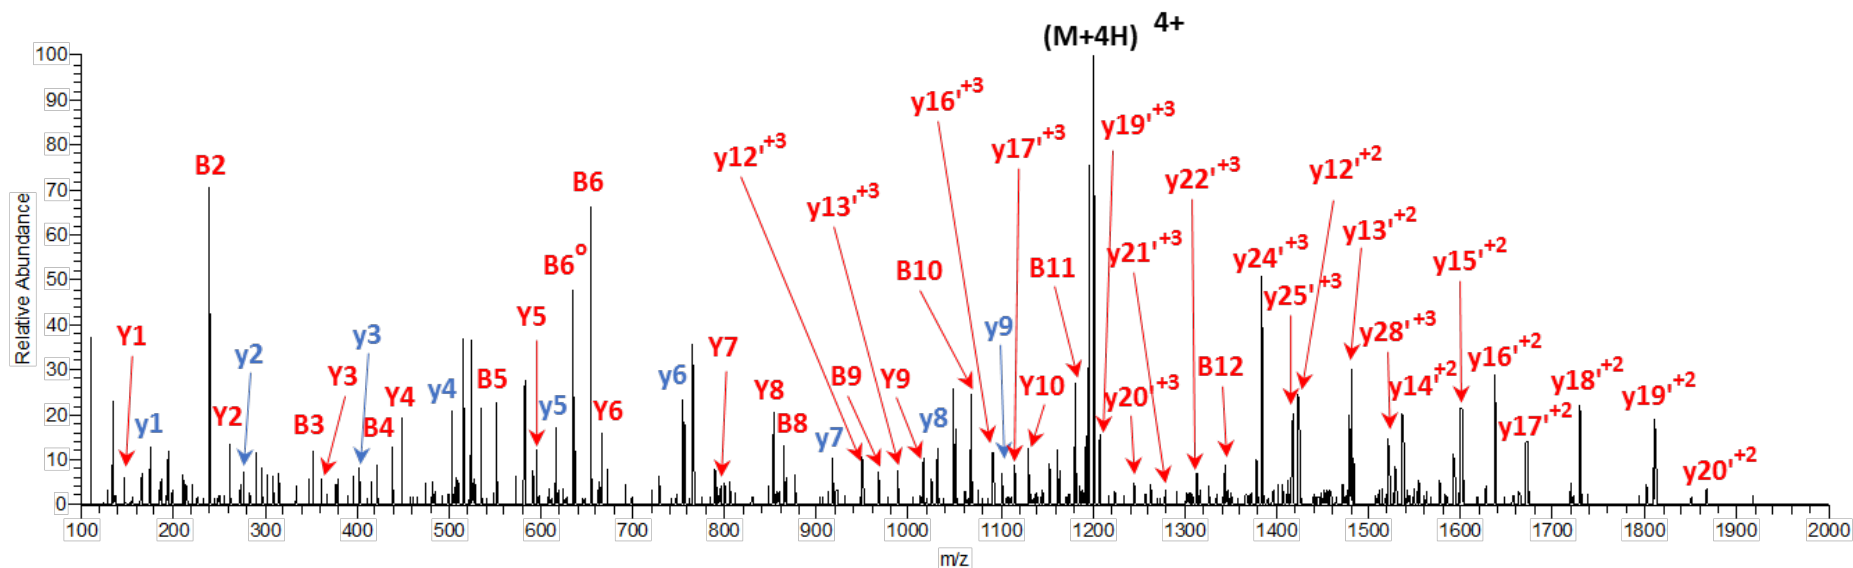

B

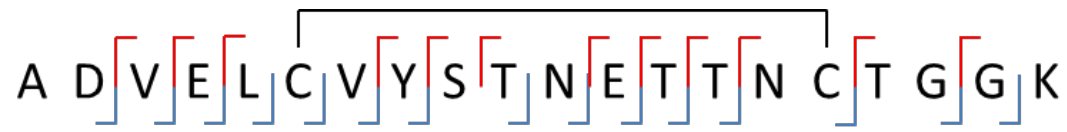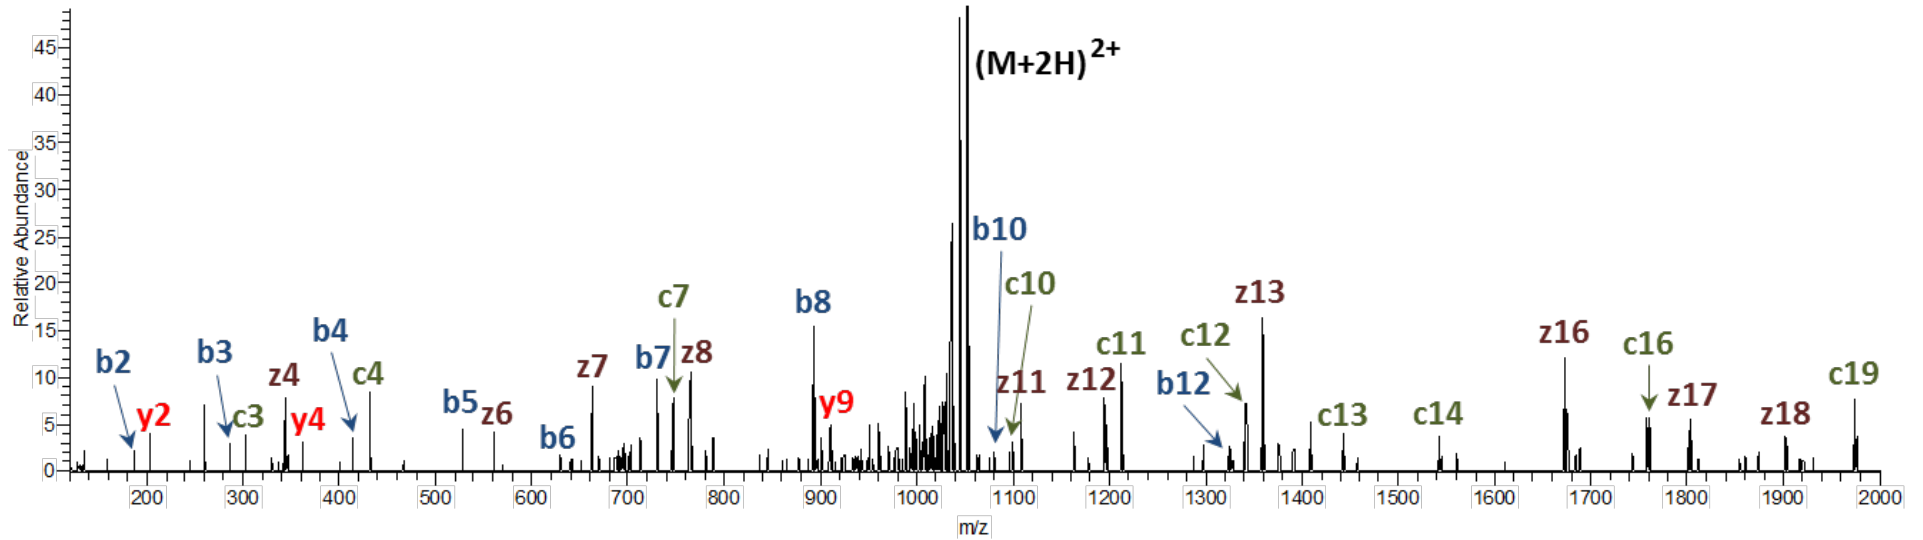

C

GTDASLFPANFCGSVTQ + y16' y15' y14' y11' y10'

G D G T L A N M E Y I L Q A T G N A A T G V T W T T C K

b2 b3 b4 b5 b6 b7 b8 b9 b10 b11 b12 b13 b14 b18+2

G T D A S L F P A N F C G S V T Q

B2 B3 B4 B5 B6 B7 B8 B9 B10 B11

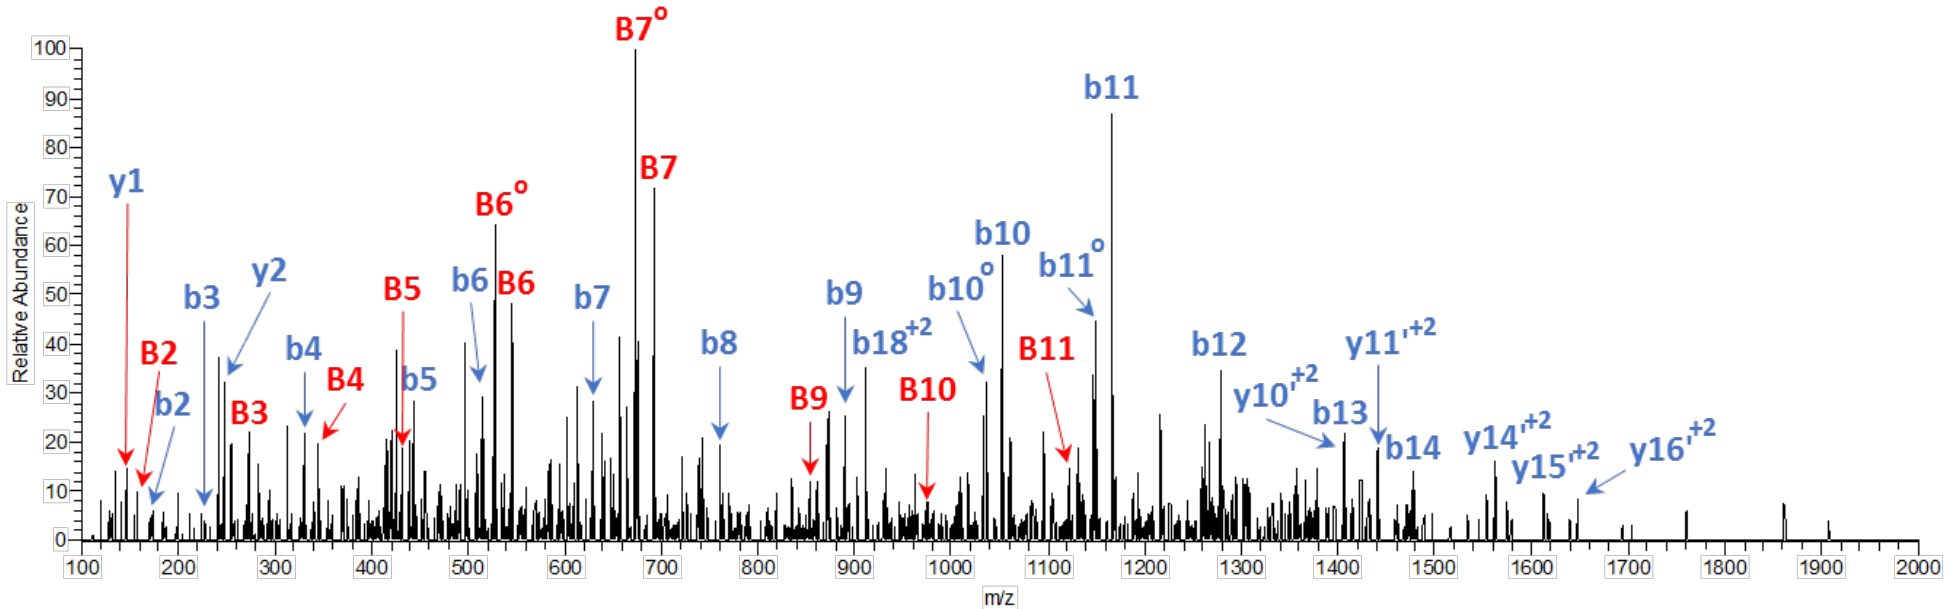

| Identified protein | Experiment          | Search Type   | Sequence                                                                                                                                                                                                                                                                  | Number of Matching |                     | Theoretical Mass | Observed Mass | Mass Diff Da | Mass Diff ppm | B-ions | C-ions | Y-ions | Z-ions | PCS score | P Score | % Fragments Explained | % Residue Cleavages |
|--------------------|---------------------|---------------|---------------------------------------------------------------------------------------------------------------------------------------------------------------------------------------------------------------------------------------------------------------------------|--------------------|---------------------|------------------|---------------|--------------|---------------|--------|--------|--------|--------|-----------|---------|-----------------------|---------------------|
|                    |                     |               |                                                                                                                                                                                                                                                                           | Fragments          | PTMs                |                  |               |              |               |        |        |        |        |           |         |                       |                     |
| PIIA               | HCD fragmentation   | ProSight Lite | GSSHHHHHSSGLVPRGSHMTKKAASSELLQASAPYKADVELCV<br>YSTNETTNTGGKNGIAADITTAAGYVKSVTTSNGAITVKGDTLA<br>NMEYLQATGNAATGVTWTTTCKGTASLFPANFCGSVTQ                                                                                                                                     | 72                 | disulfide bond (x2) | 13374.44         | 13374.49      | 0.05         | 3.7           | 53     |        | 19     |        | 943       | 1.6E-80 | 16                    | 48                  |
| PIIA               | ETHcD fragmentation | ProSight Lite | GSSHHHHHSSGLVPRGSHMTKKAASSELLQASAPYKADVELCV<br>YSTNETTNTGGKNGIAADITTAAGYVKSVTTSNGAITVKGDTLA<br>NMEYLQATGNAATGVTWTTTCKGTASLFPANFCGSVTQ                                                                                                                                     | 72                 | disulfide bond (x2) | 13374.44         | 13374.49      | 0.01         | 1.0           | 21     | 31     | 2      | 18     | 730       | 3.1E-64 | 39                    | 34                  |
| PE                 | HCD fragmentation   | ProSight Lite | SAQIQKAEQNDVKLAPPTDVRSGYIRLVKNVNYIDESIIVVDNQ<br>EPQIVHFDVAVNLDKGLVYVPEPKRYARSVRQYKILNCANYHLTQ<br>VRTDFYDEFWQGLRAAPKQKKTLSLTPDTTLYNAAQIICANY<br>GEAFSVDKLLVPR                                                                                                              | 58                 | disulfide bond (x1) | 17071.78         | 17071.77      | -0.02        | -0.9          | 32     |        |        | 26     | 414       | 1.2E-39 | 6                     | 32                  |
| PE                 | ETHcD fragmentation | ProSight Lite | SAQIQKAEQNDVKLAPPTDVRSGYIRLVKNVNYIDESIIVVDNQ<br>EPQIVHFDVAVNLDKGLVYVPEPKRYARSVRQYKILNCANYHLTQ<br>VRTDFYDEFWQGLRAAPKQKKTLSLTPDTTLYNAAQIICANY<br>GEAFSVDKLLVPR                                                                                                              | 36                 | disulfide bond (x1) | 17071.78         | 17071.74      | -0.05        | -2.6          | 3      | 29     | 4      | 0      | 295       | 3.6E-30 | 36                    | 24                  |
| PE-PIIA            | ETHcD fragmentation | ProSight Lite | IQKAEQNDVKLAPPTDVRSGYIRLVKNVNYIDESIIVVDNQEPQI<br>VHFDVAVNLDKGLVYVPEPKRYARSVRQYKILNCANYHLTQVRTD<br>FYDEFWQGLRAAPKQKKTLSLTPDTTLYNAAQIICANYGEAFS<br>VDKKGTTKKAASSELLQASAPYKADVELCVYSTNETTNTGGKNG<br>IAADITTAAGYVKSVTTSNGAITVKGDTLANMEYLQATGNAATG<br>VTWTTTCKGTASLFPANFCGSVTQ | 40                 | disulfide bond (x3) | 27628.84         | 27628.85      | 0.00         | 0.4           | 12     | 24     | 3      | 1      | 506       | 7.5E-47 | 55                    | 12                  |
| PE-PIIA            | HCD fragmentation   | ProSight Lite | IQKAEQNDVKLAPPTDVRSGYIRLVKNVNYIDESIIVVDNQEPQI<br>VHFDVAVNLDKGLVYVPEPKRYARSVRQYKILNCANYHLTQVRTD<br>FYDEFWQGLRAAPKQKKTLSLTPDTTLYNAAQIICANYGEAFS<br>VDKKGTTKKAASSELLQASAPYKADVELCVYSTNETTNTGGKNG<br>IAADITTAAGYVKSVTTSNGAITVKGDTLANMEYLQATGNAATG<br>VTWTTTCKGTASLFPANFCGSVTQ | 24                 | disulfide bond (x3) | 27628.84         | 27628.80      | -0.04        | -1.4          | 22     |        |        | 2      | 503       | 1.2E-46 | 36                    | 10                  |

**Table S2. TOP DOWN RESULTS WITH NO REDUCTION OF DISULFIDE BRIDGES**

| Identified protein | Sequence                                                                                                                                                                                                                                                | Number of Matching Fragments | PTMs | Theoretical Mass | Observed Mass Da | Mass Diff Da | Mass Diff |        |        | PCS score | P Score  | % Fragments Explained | % Residue Cleavages |
|--------------------|---------------------------------------------------------------------------------------------------------------------------------------------------------------------------------------------------------------------------------------------------------|------------------------------|------|------------------|------------------|--------------|-----------|--------|--------|-----------|----------|-----------------------|---------------------|
|                    |                                                                                                                                                                                                                                                         |                              |      |                  |                  |              | ppm       | B-ions | Y-ions |           |          |                       |                     |
| PiIA               | GSSHHHHHSSGLVPRGSHMTKKAASSELLQASAPYKADVLCVYSTNETTCTGGKNGIAADITTAAGYVKSVTTSNGAITVKGDGTLANMEYLQATGNAATGVTWTTTCKGTDASLFPANFCGSVTQ                                                                                                                          | 101                          | none | 13378.47         | 13378.45         | -0.02        | -1.5      | 75     | 26     | 1333      | 3.0E-110 | 16                    | 64                  |
| PE                 | SAQIQKAEQNDVKLAPPTDVRSGYIRLVKNVNYIDSESIWVDNQEPQIVHFDVAVVNLKGLYVYPEPKRYARSVRQYKILNCANYHLTQVRTDFYDEFWGQGLRAAPKQKKHTLSLTPDTTLYNAAQIICANYGEAFSVDKGLVPR                                                                                                      | 23                           | none | 17073.80         | 17073.83         | 0.04         | 2.1       | 12     | 11     | 353       | 8.9E-35  | 27                    | 16                  |
| PE-PiIA            | IQKAEQNDVKLAPPTDVRSGYIRLVKNVNYIDSESIWVDNQEPQIVHFDVAVVNLKGLYVYPEPKRYARSVRQYKILNCANYHLTQVRTDFYDEFWGQGLRAAPKQKKHTLSLTPDTTLYNAAQIICANYGEAFSVDKGGTKKAASVELLQASAPYKADVLCVYSTNETTCTGGKNGIAADITTAAGYVKSVTTSNGAITVKGDGTLANMEYLQATGNAATGVTWTTTCKGTDASLFPANFCGSVTQ | 30                           | none | 27634.89         | 27634.93         | 0.05         | 1.7       | 23     | 7      | 343       | 5.1E-34  | 17                    | 12                  |

**Table S3** TOP DOWN RESULTS WITH REDUCTION OF DISULFIDE BRIDGES

Table 4A. PE Crystallography data collection and analysis.

| Parameter                      | PE (Dataset 1)  |             | PE (Dataset 2)  |             | PE (NaBr)       |             | PE (KI)         |             |
|--------------------------------|-----------------|-------------|-----------------|-------------|-----------------|-------------|-----------------|-------------|
|                                | Overall         | Outer shell | Overall         | Outer shell | Overall         | Outer shell | Overall         | Outer shell |
| Space group                    | I4 <sub>1</sub> |             | I4 <sub>1</sub> |             | I4 <sub>1</sub> |             | I4 <sub>1</sub> |             |
| a (Å)                          | 77.64           |             | 77.67           |             | 77.26           |             | 77.13           |             |
| b (Å)                          | 77.64           |             | 77.67           |             | 77.26           |             | 77.13           |             |
| c (Å)                          | 65.73           |             | 66.13           |             | 66.29           |             | 67.58           |             |
| $\alpha$ (°)                   | 90              |             | 90              |             | 90              |             | 90              |             |
| $\beta$ (°)                    | 90              |             | 90              |             | 90              |             | 90              |             |
| $\gamma$ (°)                   | 90              |             | 90              |             | 90              |             | 90              |             |
| Low resolution limit (Å)       | 27.45           | 2.11        | 30.75           | 1.97        | 27.32           | 2.11        | 25.42           | 2.32        |
| High resolution limit (Å)      | 2.00            | 2.00        | 1.92            | 1.92        | 2.00            | 2.00        | 2.20            | 2.20        |
| R <sub>merge</sub>             | 0.051           | 0.398       | 0.029           | 0.466       | 0.067           | 0.820       | 0.096           | 0.517       |
| R <sub>meas</sub> within I+/I- | 0.061           | 0.473       | 0.034           | 0.545       | 0.073           | 0.883       | 0.103           | 0.559       |
| R <sub>meas</sub> all I+/I-    | 0.060           | 0.476       | 0.034           | 0.545       | 0.074           | 0.877       | 0.121           | 0.558       |
| R <sub>pim</sub> within I+/I-  | 0.032           | 0.249       | 0.018           | 0.281       | 0.027           | 0.325       | 0.039           | 0.211       |
| R <sub>pim</sub> all I+/I-     | 0.023           | 0.180       | 0.013           | 0.201       | 0.019           | 0.231       | 0.032           | 0.150       |
| Fractional partial bias        | -0.029          | -0.107      | 0               | 0           | -0.022          | -0.233      | -0.039          | -0.181      |
| Total number of reflections    | 91978           | 7787        | 103007          | 7787        | 187156          | 26975       | 139904          | 20112       |
| Number of unique               | 13226           | 1084        | 14861           | 1084        | 13223           | 1920        | 10123           | 1464        |



|                       |  |  |      |  |  |  |  |  |
|-----------------------|--|--|------|--|--|--|--|--|
| Protein               |  |  | 58.7 |  |  |  |  |  |
| Ligand/Ion            |  |  | 73.2 |  |  |  |  |  |
| Water                 |  |  | 61.5 |  |  |  |  |  |
| Ramachandran analysis |  |  |      |  |  |  |  |  |
| Favoured (%)          |  |  | 95.1 |  |  |  |  |  |
| Allowed (%)           |  |  | 4.2  |  |  |  |  |  |
| Outliers (%)          |  |  | 0.7  |  |  |  |  |  |
| Molprobity ClashScore |  |  | 3.84 |  |  |  |  |  |

Each dataset was collected from one crystal.

<sup>a</sup>Highest-resolution shell is shown in parenthesis.

<sup>b</sup>Phasing power calculated as r.m.s. ( $|F_h|/E$ ), where  $|F_h|$  is the heavy-atom structure factor amplitude and  $E$  the residual lack of closure error.

<sup>c</sup>Acentric reflections.  $R_{\text{Cullis}}$  calculated as  $(\sum|E|/\sum||F_{\text{PH}}| - |F_{\text{P}}|)|$ ), where  $F_{\text{PH}}$  is the amplitude of the protein plus the heavy atom and  $F_{\text{P}}$  is the amplitude of the protein.



Table 4B. PE-PilA Crystallography data collection and analysis.

| Parameter                          | PE-PilA |             |
|------------------------------------|---------|-------------|
|                                    | Overall | Outer shell |
| Space group                        | C2      |             |
| a (Å)                              | 128.618 |             |
| b (Å)                              | 83.458  |             |
| c (Å)                              | 59.049  |             |
| $\alpha$ (°)                       | 90      |             |
| $\beta$ (°)                        | 102.52  |             |
| $\gamma$ (°)                       | 90      |             |
| Low resolution limit (Å)           | 47.96   | 1.69        |
| High resolution limit (Å)          | 1.63    | 1.63        |
| R <sub>merge</sub>                 | 0.062   | 0.543       |
| R <sub>meas</sub> within I+/I-     | 0.074   | 0.649       |
| R <sub>meas</sub> all I+/I-        | 0.074   | 0.649       |
| R <sub>pim</sub> within I+/I-      | 0.039   | 0.351       |
| R <sub>pim</sub> all I+/I-         | 0.039   | 0.351       |
| Fractional partial bias            | 0       | 0           |
| Total number of reflections        | 256262  | 24401       |
| Number of unique reflections       | 75506   | 7386        |
| Mean (I)/ $\sigma$ (I)             | 10.4    | 2           |
| Completeness                       | 99.5    | 99.4        |
| Multiplicity                       | 3.4     | 3.3         |
|                                    |         |             |
| Refinement statistics              |         |             |
| Rfactor                            | 0.179   |             |
| Rfree                              | 0.209   |             |
| No atoms                           | 4332    |             |
| RMS bond lengths (Å)               | 0.008   |             |
| RMS bond angles (°)                | 1.245   |             |
| Wilson B-factor (Å <sup>2</sup> )  | 24.57   |             |
| Average B-Factor (Å <sup>2</sup> ) |         |             |
| Protein – Chain A                  | 30.0    |             |
| Protein – Chain B                  | 24.9    |             |
| Ligand/Ion                         | 51.0    |             |
| Water – Chain V                    | 40.4    |             |
| Water – Chain W                    | 39.7    |             |
| Ramachandran                       |         |             |

|                          |      |  |
|--------------------------|------|--|
| analysis                 |      |  |
| Favoured (%)             | 98.5 |  |
| Allowed (%)              | 1.5  |  |
| Outliers (%)             |      |  |
| Molprobity<br>ClashScore | 3.03 |  |

Each dataset was collected from one crystal.

<sup>a</sup>Highest-resolution shell is shown in parenthesis.

<sup>b</sup>Phasing power calculated as r.m.s. ( $|F_h|/E$ ), where  $|F_h|$  is the heavy-atom structure factor amplitude and  $E$  the residual lack of closure error.

<sup>c</sup>Acentric reflections.  $R_{\text{Cullis}}$  calculated as  $(\sum|E|/\sum||F_{\text{PH}}| - |F_{\text{P}}||)$ , where  $F_{\text{PH}}$  is the amplitude of the protein plus the heavy atom and  $F_{\text{P}}$  is the amplitude of the protein.
